# Supplementary material for: Prediction of electronic, magnetic, and structural stability characteristics in Al- and Ga-doped single-walled SiC nanotubes: ab initio study using DFT
Source: Royal Society of Chemistry journal article supplement (doi:10.1039/d5cp03523f), 2025-01-01
Supplement: d5cp03523f1.pdf [file d5cp03523f1.pdf]

## Supplementary File 1

Band structures and total density of states (TDOS) diagrams for the double ( $x=16.6\%$ ) Al/Ga-doped (6,0) SWSiCNT system at Si/C sites.

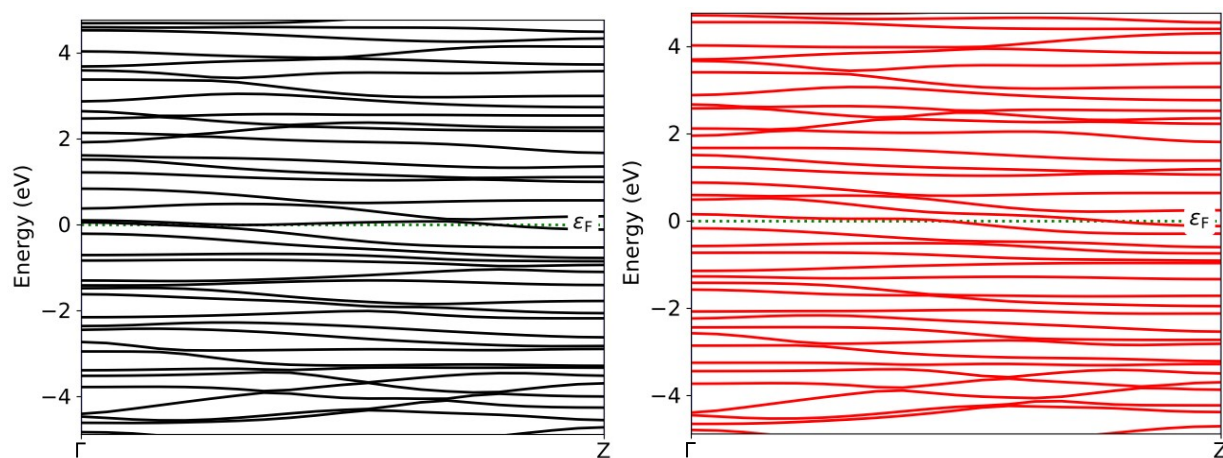

**Fig. 1.** The calculated spin-up (black) and spin-down (red) band structures for  $\text{Si}_{10}\text{Al}_2\text{C}_{12}$  NTs.

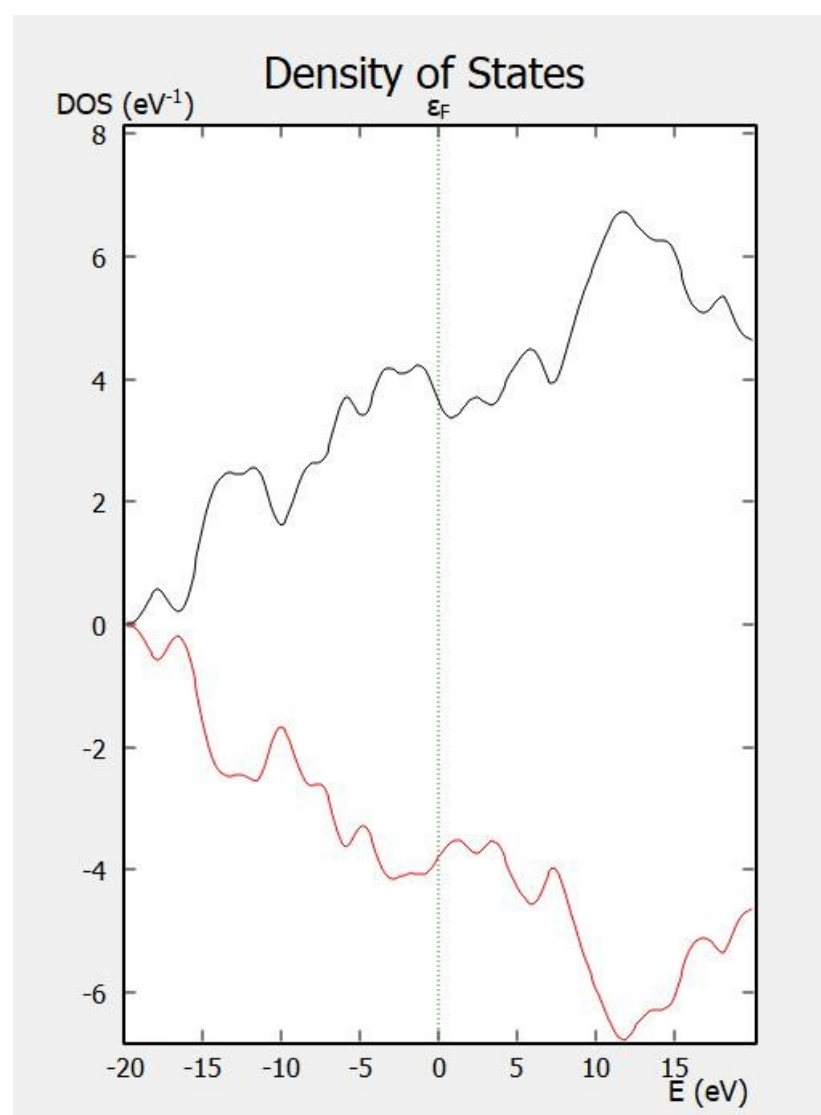

**Fig. 2.** The calculated TDOS diagram for  $\text{Si}_{10}\text{Al}_2\text{C}_{12}$  NTs.

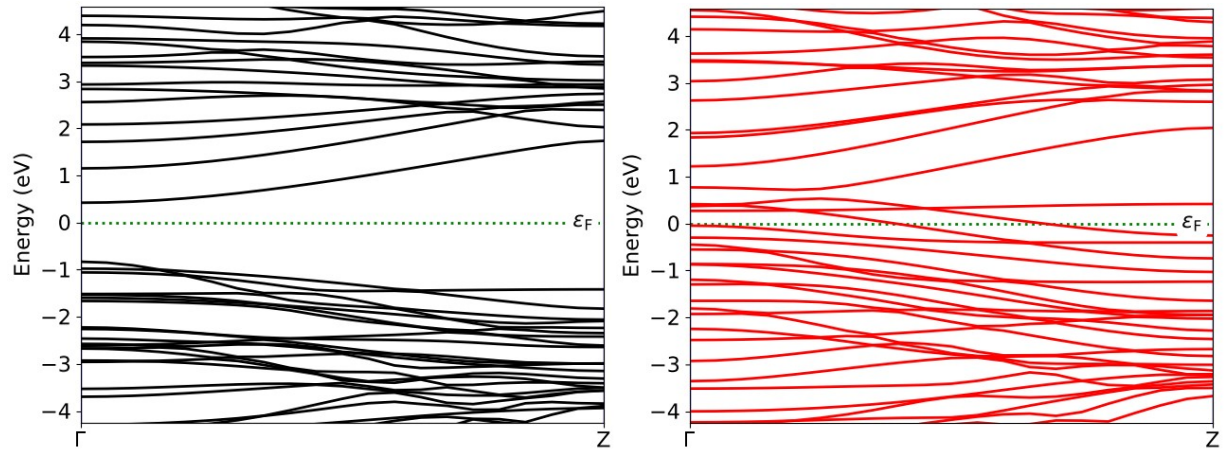

**Fig. 3.** The calculated spin-up (black) and spin-down (red) band structures for  $\text{Si}_{10}\text{Ga}_2\text{C}_{12}$  NTs.

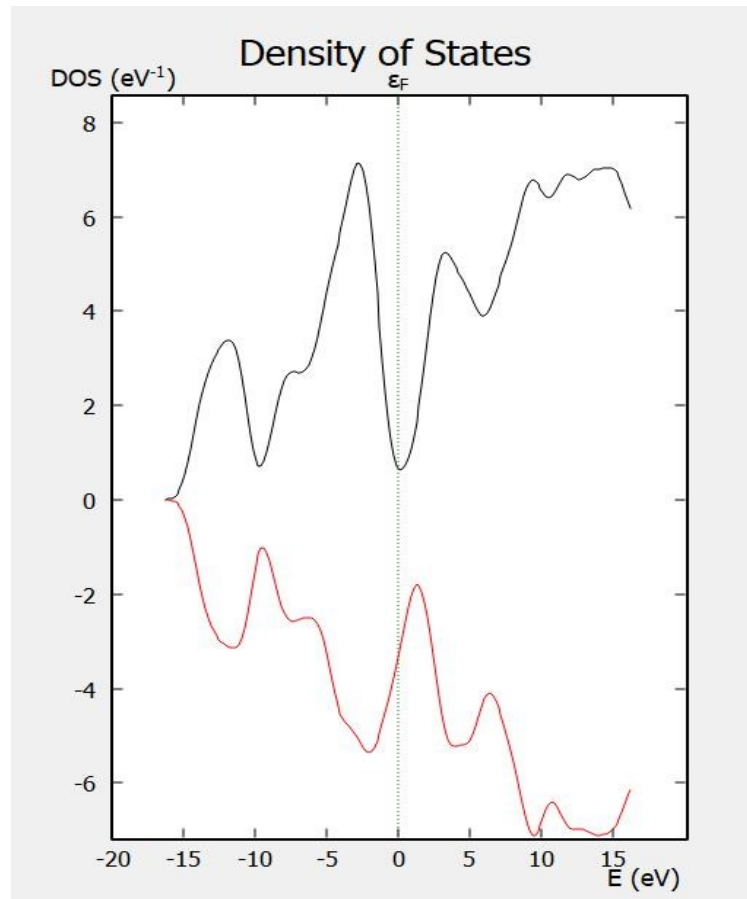

**Fig. 4.** The calculated TDOS diagram for  $\text{Si}_{10}\text{Ga}_2\text{C}_{12}$  NTs.

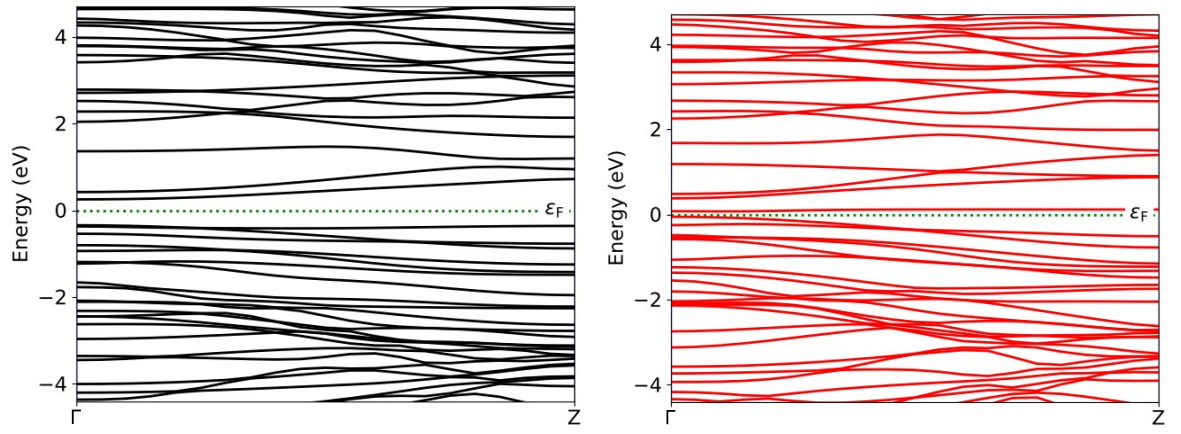

**Fig. 5.** The calculated spin-up (black) and spin-down (red) band structures for  $\text{Si}_{12}\text{C}_{10}\text{Al}_2$  NTs.

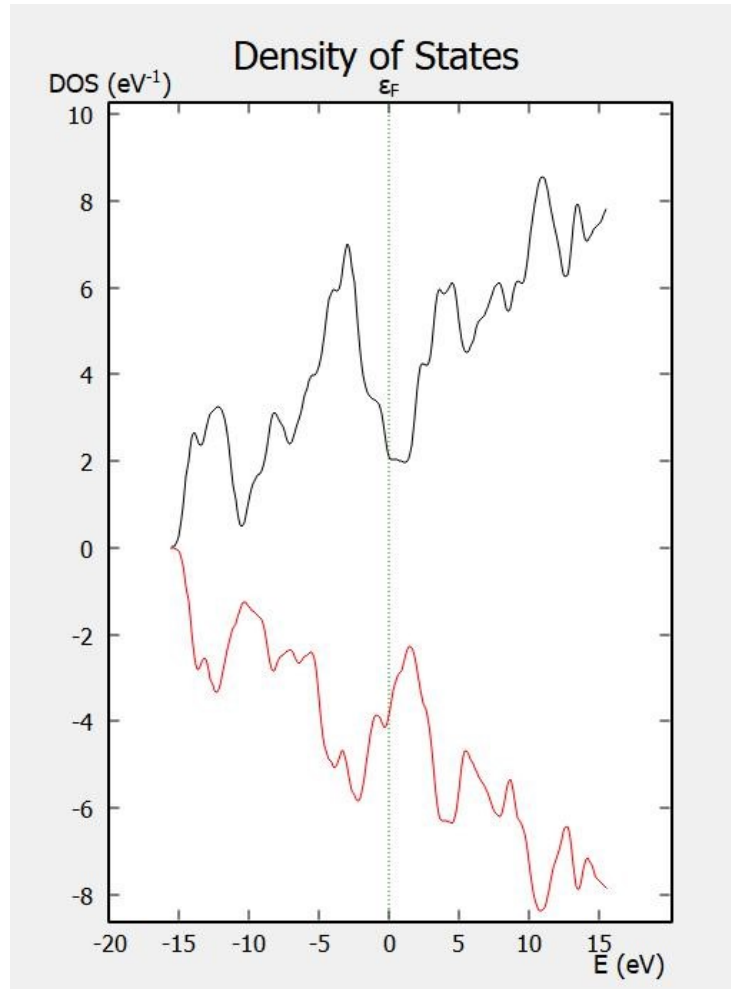

**Fig. 6.** The calculated TDOS diagram for  $\text{Si}_{12}\text{C}_{10}\text{Al}_2$  NTs.

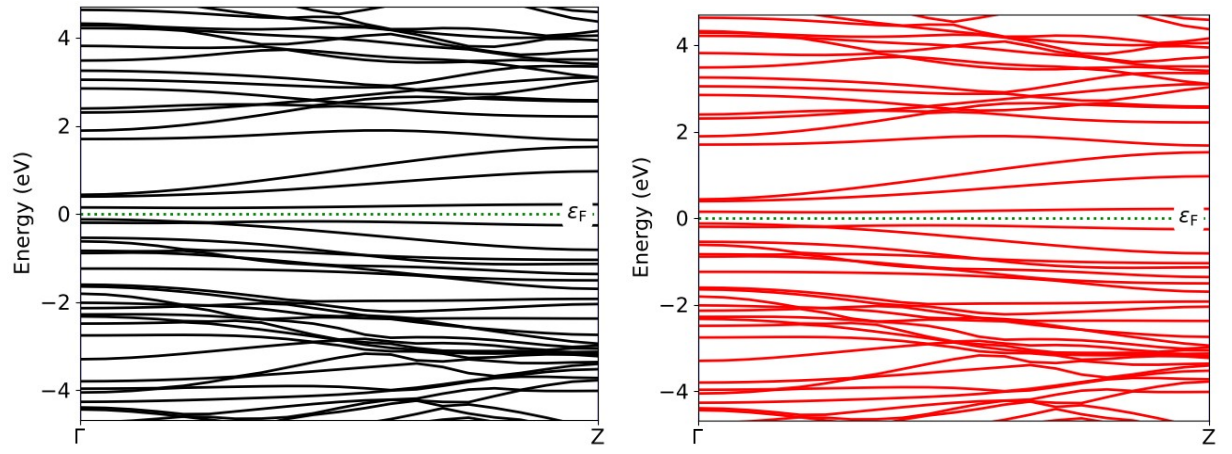

**Fig. 7.** The calculated spin-up (black) and spin-down (red) band structures for  $\text{Si}_{12}\text{C}_{10}\text{Ga}_2$  NTs.

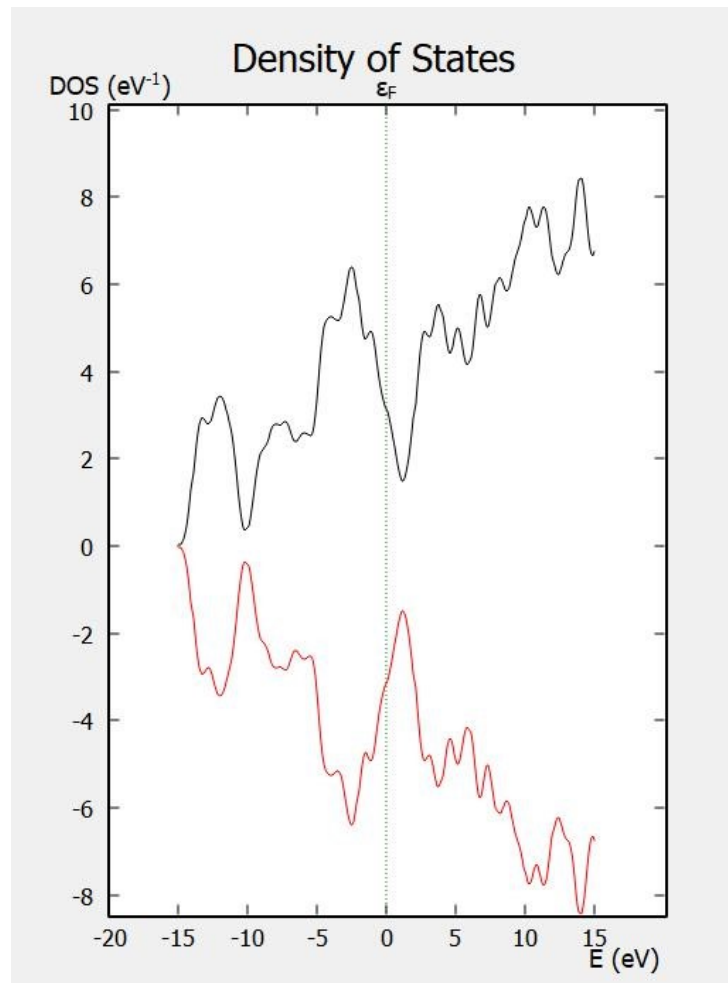

**Fig. 8.** The calculated TDOS diagram for  $\text{Si}_{12}\text{C}_{10}\text{Ga}_2$  NTs.
