# Supplementary material for: Prediction of electronic, magnetic, and structural stability characteristics in Al- and Ga-doped single-walled SiC nanotubes: ab initio study using DFT
Source: Royal Society of Chemistry journal article supplement (doi:10.1039/d5cp03523f), 2025-01-01
Supplement: d5cp03523f3.pdf [file d5cp03523f3.pdf]

### Spin polarization views for double Al/Ga-doped (6,0) SWSiCNTs at Si/C sites

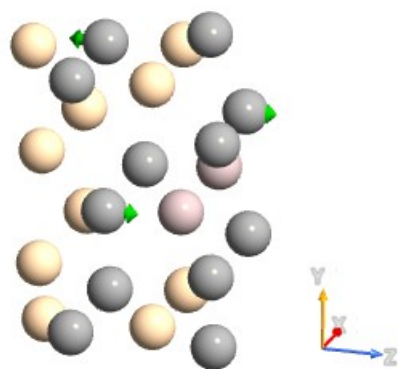

**Figure 1.** Spin polarization view for double Al-doped SWSiCNT at Si sites: green arrows indicate the direction and magnitude of the local magnetic moments. Gray: C atoms, beige: Si atoms, and pink: Al atom.

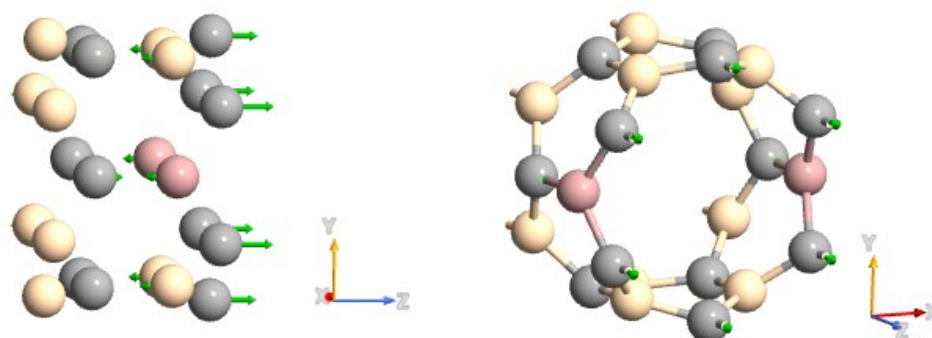

**Figure 2.** Spin polarization views for double Ga-doped SWSiCNTs at Si sites: green arrows indicate the direction and magnitude of the local magnetic moments. Gray: C atoms, beige: Si atoms, and pink: Ga atom.

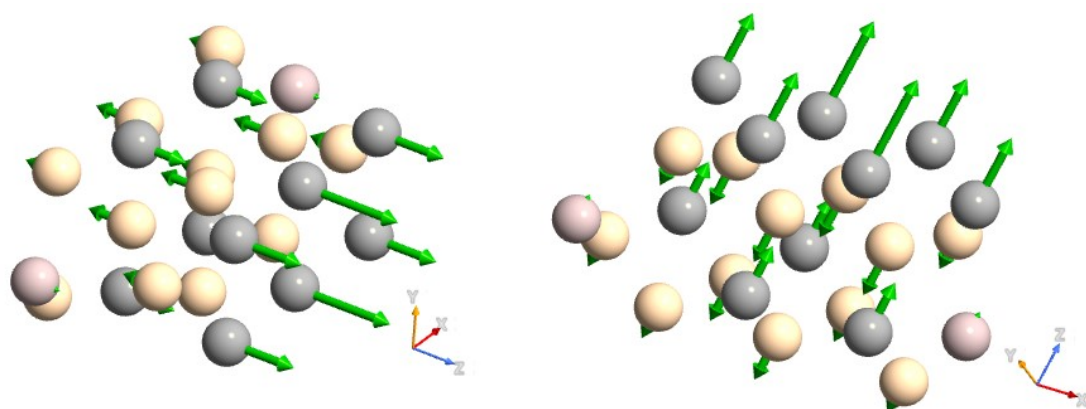

**Figure 3.** Spin polarization view for double Al-doped SWSiCNT at C sites: green arrows indicate the direction and magnitude of the local magnetic moments. Gray: C atoms, beige: Si atoms, and pink: Al atom.

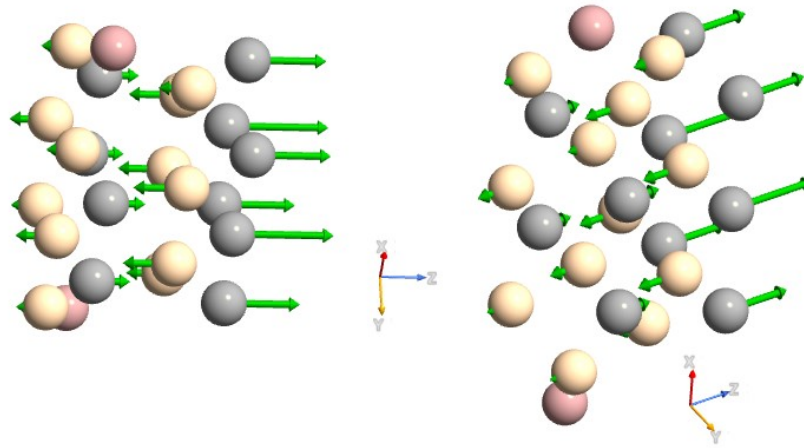

**Figure 4.** Spin polarization view for double Ga-doped SWSiCNT at C sites: green arrows indicate the direction and magnitude of the local magnetic moments. Gray: C atoms, beige: Si atoms, and pink: Ga atom.
